# Supplementary material for: The effect of C2 substitution on melting point and liquid phase dynamics of imidazolium based-ionic liquids: insights from molecular dynamics simulations
Source: Royal Society of Chemistry journal article supplement (doi:10.1039/c2cp41964e), 2012-01-01
Supplement: c2cp41964e.pdf [file c2cp41964e.pdf]

# The Effect of C2 Substitution on Melting Point and Liquid Phase Dynamics of Imidazolium Based-Ionic Liquids: Insights from Molecular Dynamics Simulations

Yong Zhang and Edward J. Maginn\*

Department of Chemical and Biomolecular Engineering

University of Notre Dame

Notre Dame, Indiana, 46556

July 11, 2012

---

\*Corresponding author. E-mail: ed@nd.edu

Table 1: Calculated self-diffusion coefficients ( $10^{-12}m^2/s$ ) at different temperatures for [BMIM][PF6].

|     | cation | anion  |
|-----|--------|--------|
| 300 | 7.25   | 3.57   |
| 330 | 32.75  | 19.72  |
| 360 | 85.85  | 61.73  |
| 390 | 188.85 | 132.16 |
| 420 | 304.09 | 258.28 |
| 450 | 552.20 | 380.87 |

Table 2: Calculated self-diffusion coefficients ( $10^{-12}m^2/s$ ) at different temperatures for [BMIM][PF6].

|     | cation | anion  |
|-----|--------|--------|
| 300 | 2.09   | 1.73   |
| 330 | 5.98   | 3.73   |
| 360 | 17.15  | 12.48  |
| 390 | 57.16  | 43.43  |
| 420 | 149.72 | 111.91 |
| 450 | 302.97 | 268.01 |

Table 3: Calculated self-diffusion coefficients ( $10^{-12}m^2/s$ ) at different temperatures for [EMIM][PF6].

|     | cation  | anion  |
|-----|---------|--------|
| 350 | 90.63   | 54.18  |
| 380 | 198.63  | 129.75 |
| 410 | 338.22  | 241.05 |
| 440 | 593.14  | 419.03 |
| 470 | 825.80  | 656.65 |
| 500 | 1144.07 | 929.36 |

Table 4: Calculated self-diffusion coefficients ( $10^{-12}m^2/s$ ) at different temperatures for [EM-MIM][PF6].

|     | cation  | anion  |
|-----|---------|--------|
| 400 | 130.27  | 89.96  |
| 430 | 302.72  | 210.29 |
| 460 | 445.36  | 372.44 |
| 490 | 756.17  | 640.83 |
| 520 | 1087.18 | 927.94 |

Table 5: Fitting coefficients of Vogel-Fulcher-Tamman (VFT) equation  $D = Ae^{-B/(T-T_g)}$  for the self-diffusion coefficients of the studied ionic liquids. The two low temperature points in [BMMIM][PF6] were ignored in the fitting. (Units: A in  $10^{-8}m^2/s$ , B and  $T_g$  in K)

|              | cation  |       |        | anion   |        |        |
|--------------|---------|-------|--------|---------|--------|--------|
|              | A       | B     | $T_g$  | A       | B      | $T_g$  |
| [BMIM][PF6]  | 1146.93 | 2.75  | 160.58 | 954.63  | 1.43   | 184.94 |
| [BMMIM][PF6] | 1720.11 | 13.89 | 168.94 | 3376.09 | 283.68 | 86.14  |
| [EMIM][PF6]  | 1228.70 | 3.67  | 145.29 | 1478.82 | 5.41   | 135.70 |
| [EMMIM][PF6] | 1000.06 | 2.76  | 212.44 | 1129.40 | 3.63   | 211.63 |
